# Supplementary material for: Arkansas Rice: Herbicide Resistance Concerns, Production Practices, and Weed Management Costs
Source: Frontiers journal article supplement (doi:10.3389/fagro.2022.881667), 2022-04-25
Supplement: Data_Sheet_1.pdf [file Data_Sheet_1.pdf]

# Weed Management Survey - Rice

## Demographics

1. Which of the following best describe your employment?
  - a. Farmer
  - b. Consultant
  - c. Industry representative (sales, tech service, distribution, etc.)
  - d. Other (explain)
2. How many rice acres did you farm or scout this year?
3. How long have you been actively involved in rice production?
  - a) 5 years or less
  - b) 6-10 years
  - c) 11-15 years
  - d) 16-20 years
  - e) 21-25 years
  - f) 26-30 years
  - g) More than 30 years
4. County(ies) farmed or scouted in:

---

## General Weed Control

5. What percentage of the rice acres you farm, or scout are continuous rice (3 years consecutive rice or more)?
  - a. 0-9%
  - b. 10-19%
  - c. 20-29%
  - d. 30-39%
  - e. 40-49%
  - f.  $\geq 50\%$
6. What is the limitation for crop rotation? (check all that apply)
  - a. Landowner requirements
  - b. Zero-grade fields
  - c. Field/soil type
  - d. Commodity price/profitability
  - e. Other \_\_\_\_\_

7. Average cost of herbicides for weed control each year?
- Less than 80 \$/acre
  - 80 – 99 \$/acre
  - 100 – 119 \$/acre
  - 120 – 139 \$/acre
  - 140 – 159 \$/acre
  - 160 – 179 \$/acre
  - 180 – 199 \$/acre
  - Greater than 200 \$/acre
8. Rank in order of importance what drives the selection of your first postemergence herbicide for weed control?
- Weed species emerged
  - Field history
  - Known resistance
  - Previous year's herbicide program
  - Crop injury concerns
  - Price
9. What are your three most problematic weeds in paddy rice? Rank them based on importance, with #1 being most important.
10. What are your three most problematic weeds in furrow-irrigated rice? Rank them based on importance, with #1 being most important.
11. Provide 2 areas of weed management research that would benefit your operation's profitability and/or overall weed control.
- \_\_\_\_\_
  - \_\_\_\_\_
12. Rate the importance of the current research or educational efforts on a scale of 1 to 5, where 1 = not important; 2 = rarely important; 3 = occasionally important; 4 = important; and 5 = very important.
- Rice tolerance to new herbicides
  - Effective, nonchemical approaches to weed management
  - Impact of off-target herbicide movement and injury to rice
  - Herbicide resistance screening program (ex. Barnyardgrass, annual sedge)
  - Development of new herbicide options
  - Performance of current herbicides
  - Economical weed control programs
  - Control strategies for herbicide-resistant weeds

- i. Strategies to reduce the occurrence and spread of resistant weeds
- j. Expansion of weed control options in row rice
- k. Impact of uncontrolled weeds on rice yields and overall economics
- l. Application optimization (nozzles, spray volume, adjuvants, etc.)

## **Herbicide-resistant Weeds**

13. Rate your concern with herbicide resistant weeds (select most appropriate)
- a. None
  - b. Slight
  - c. Moderate
  - d. High
14. Do you suspect herbicide-resistant weeds (excluding barnyardgrass) in the rice fields you scout?
- a. No
  - b. Yes
15. Provide the weeds (excluding barnyardgrass) and herbicide to which they are resistant.
16. What strategies are you using to control the herbicide-resistant weeds you listed above?  
(choose up to 3 strategies)
- a. Alternative herbicides
  - b. Crop rotation
  - c. Seedbank management
  - d. Cover crops
  - e. Fall deep tillage
  - f. Seed (trait) selection
  - g. Pinpoint flood
  - h. Earlier planting dates
17. Are you doing anything to minimize the occurrence of new herbicide-resistant weeds or spread of resistance?
- a. No
  - b. Yes
18. If yes, please explain what you are doing.

## **Barnyardgrass**

19. What percent of fields you farm or scout has barnyardgrass?

20. What percent of your overall herbicide expenses this year was for barnyardgrass control?

\_\_\_\_\_ (%)

21. What percent of the time do you fail to effectively control barnyardgrass with your first postemergence herbicide application?

\_\_\_\_\_ (%)

22. Do you have herbicide-resistant barnyardgrass on your farm? \_\_\_\_\_

a. If yes, to what herbicides are barnyardgrass resistant? (check all that apply)

- i. Command
- ii. Prowl
- iii. Bolero
- iv. Facet
- v. ALS Inhibitors (Newpath/Preface, Grasp, Beyond/Postscript, Regiment)
- vi. Clincher/Ricestar/Provisia
- vii. Propanil
- viii. Loyant
- ix. Roundup (pre-plant)

b. What herbicides are still effective for barnyardgrass on your farm? (check all that apply)

- i. Command
- ii. Prowl
- iii. Bolero
- iv. Facet
- v. ALS Inhibitors (Newpath/Preface, Grasp, Beyond/Postscript, Regiment)
- vi. Clincher/Ricestar/Provisia
- vii. Propanil
- viii. Loyant
- ix. Roundup (pre-plant)

23. Have you submitted a barnyardgrass sample to the Herbicide Resistance Screening Program with the U of A System Division of Agriculture in the past 5 years? \_\_\_\_\_

If yes, does this service help you make informed decisions in subsequent years? \_\_\_\_\_

24. How much average yield loss do you attribute to barnyardgrass in your rice?

- a. 0-4 bu/acre
- b. 5-9 bu/acre
- c. 10-19 bu/acre
- d. 20-29 bu/acre
- e. 30-39 bu/acre
- f. ≥40 bu/acre

25. In the most heavily infested fields, how much yield loss occurs (maximum loss)?

- a. 0-14 bu/acre
- b. 15-29 bu/acre
- c. 30-44 bu/acre
- d. 45-59 bu/acre
- e. 60-74 bu/acre
- f. 75-89 bu/acre
- g.  $\geq 90$  bu/acre

26. Rank the importance of the following factors in causing failure of herbicides to control barnyardgrass on your farm or scouted acres.

1 = highly important; 2 = moderately important; 3 = slightly important; 4 = not important

Resistance \_\_\_\_\_

Lack of adequate coverage \_\_\_\_\_

Environmental conditions \_\_\_\_\_

Size at application \_\_\_\_\_

Herbicide selection \_\_\_\_\_

27. If the initial herbicide application for barnyardgrass control fails, on average, how many additional applications are required to control it?

- a. One
- b. Two
- c. Three
- d. I never control it

28. Which of the following densities would best describe the barnyardgrass population on your farm if herbicides **were not applied**? (choose only one)

- a. No barnyardgrass present
- b. 0.1 to 0.9 plants per 10 ft<sup>2</sup>
- c. 1 to 9 plants per 10 ft<sup>2</sup>
- d. 10 to 99 plants per 10 ft<sup>2</sup>
- e. 100 to 999 plants per 10 ft<sup>2</sup>
- f. 1,000 or greater plants per 10 ft<sup>2</sup>

29. Which of the following densities best describe the barnyardgrass population in your 2020 rice crop at harvest? (choose only one)

- a. No barnyardgrass present
- b. 0.1 to 0.9 plants per 10 ft<sup>2</sup>
- c. 1 to 9 plants per 10 ft<sup>2</sup>
- d. 10 to 99 plants per 10 ft<sup>2</sup>

- e. 100 to 999 plants per 10 ft<sup>2</sup>
- f. 1,000 or greater plants per 10 ft<sup>2</sup>

30. What strategies are you implementing to manage barnyardgrass? (choose up to 3 strategies)

- a. Alternative herbicides
- b. Crop rotation
- c. Seedbank management
- d. Cover crops
- e. Fall deep tillage
- f. Seed (trait) selection
- g. Pinpoint flood
- h. Earlier planting dates
